# Supplementary material for: Association between Suicide Rate and Human Development Index, Income, and the Political System in 46 Muslim-Majority Countries: An Ecological Study
Source: MDPI journal article supplement (doi:10.3390/ejihpe12070055), 2022-07-09
Supplement: s1 [file s1]

**Supplementary 1: List of the Muslim countries**

| country                | Muslim Population | pop2021    | Muslim % |
|------------------------|-------------------|------------|----------|
| Afghanistan            | 34836014          | 39835.428  | 99.6     |
| Albania                | 1797645           | 2872.933   | 58.8     |
| Algeria                | 41240913          | 44616.624  | 99       |
| Azerbaijan             | 9735074           | 10223.342  | 96.9     |
| Bahrain                | 1063239           | 1748.296   | 73.7     |
| Bangladesh             | 153700000         | 166303.498 | 90.4     |
| Bosnia and Herzegovina | 1955084           | 3263.466   | 50.7     |
| Brunei                 | 355045            | 441.532    | 78.8     |
| Burkina Faso           | 12141769          | 21497.096  | 61.5     |
| Chad                   | 9183207           | 16914.985  | 58       |
| Comoros                | 807204            | 888.451    | 98.3     |
| Djibouti               | 857496            | 1002.187   | 97       |
| Egypt                  | 87500000          | 104258.327 | 92.35    |
| Gambia                 | 2002743           | 2486.945   | 95.7     |
| Guinea                 | 10563171          | 13497.244  | 89.1     |
| Indonesia              | 229000000         | 276361.783 | 87.2     |
| Iran                   | 82500000          | 85028.759  | 99.4     |
| Iraq                   | 38465864          | 41179.35   | 95.7     |
| Jordan                 | 10165577          | 10269.021  | 97.2     |
| Kazakhstan             | 13158672          | 18994.962  | 70.2     |
| Kuwait                 | 2175684           | 4328.55    | 74.6     |
| Kyrgyzstan             | 4679436           | 6628.356   | 80       |
| Lebanon                | 3519743           | 6769.146   | 57.7     |
| Libya                  | 6551871           | 6958.532   | 97       |
| Malaysia               | 16318355          | 32776.194  | 61.3     |
| Maldives               | 386193            | 543.617    | 98.4     |
| Mali                   | 17508398          | 20855.735  | 95       |
| Mauritania             | 3840429           | 4775.119   | 100      |
| Mayotte                | 253439            | 279.515    | 97       |
| Morocco                | 37930989          | 37344.795  | 99       |
| Niger                  | 21101926          | 25130.817  | 98.3     |
| Oman                   | 2427000           | 5223.375   | 85.9     |
| Pakistan               | 200400000         | 225199.937 | 96.5     |
| Palestine              | 4298000           | 5222.748   | 97.5     |
| Qatar                  | 1566786           | 2930.528   | 77.5     |
| Saudi Arabia           | 31878000          | 35340.683  | 97.1     |
| Senegal                | 15112721          | 17196.301  | 96.1     |
| Sierra Leone           | 6067706           | 8141.343   | 78.6     |

|                      |          |           |      |
|----------------------|----------|-----------|------|
| Somalia              | 10978000 | 16359.504 | 99.8 |
| Sudan                | 39585777 | 44909.353 | 97   |
| Syria                | 16700000 | 18275.702 | 93   |
| Tajikistan           | 7621700  | 9749.627  | 96.7 |
| Tunisia              | 11190000 | 11935.766 | 99.8 |
| Turkey               | 79850000 | 85042.738 | 99.2 |
| Turkmenistan         | 4830000  | 6117.924  | 93.3 |
| United Arab Emirates | 4615081  | 9991.089  | 76   |
| Uzbekistan           | 26550000 | 33935.763 | 96.5 |
| Western Sahara       | 599633   | 611.875   | 99.4 |
| Yemen                | 27784498 | 30490.64  | 99.1 |

Source: World Population Review, nd. Muslim Majority Countries 2021. (accessed on 15 June 2021). <https://worldpopulationreview.com/country-rankings/muslim-majority-countries>
